# Supplementary material for: Vitamin D in early life and later risk of multiple sclerosis—A systematic review, meta-analysis
Source: PubMed Central journal article supplement (PMC6711523; doi:10.1371/journal.pone.0221645), 2019-08-27

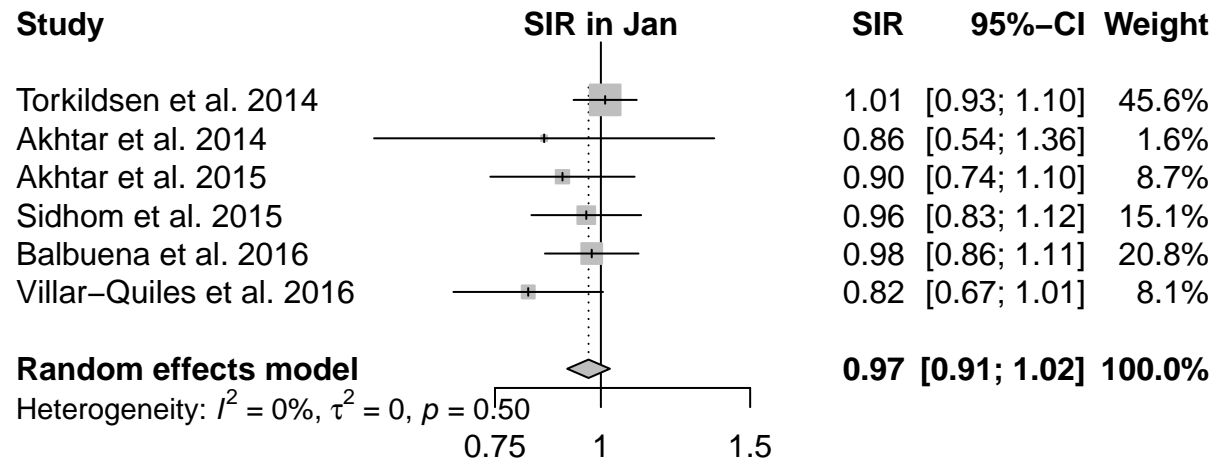

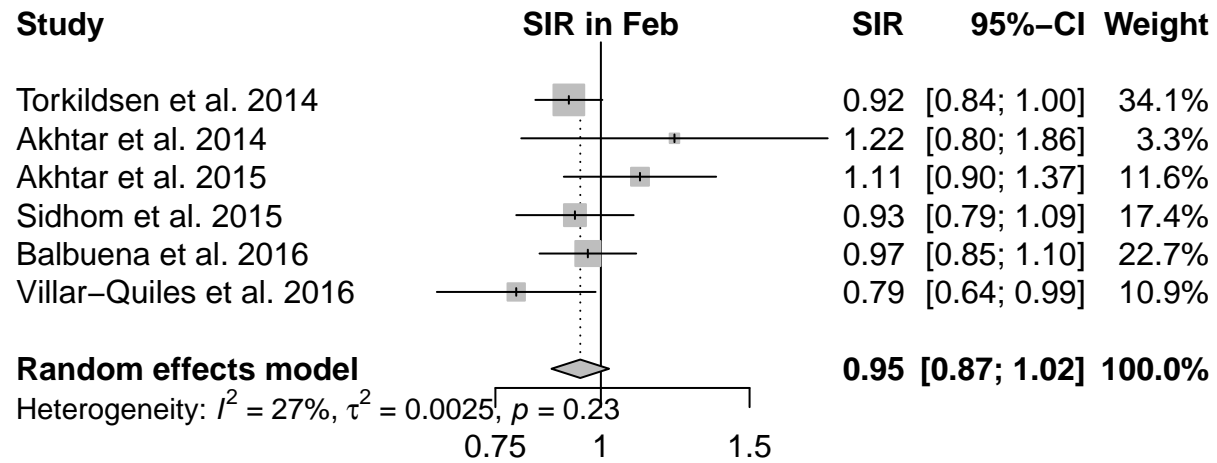

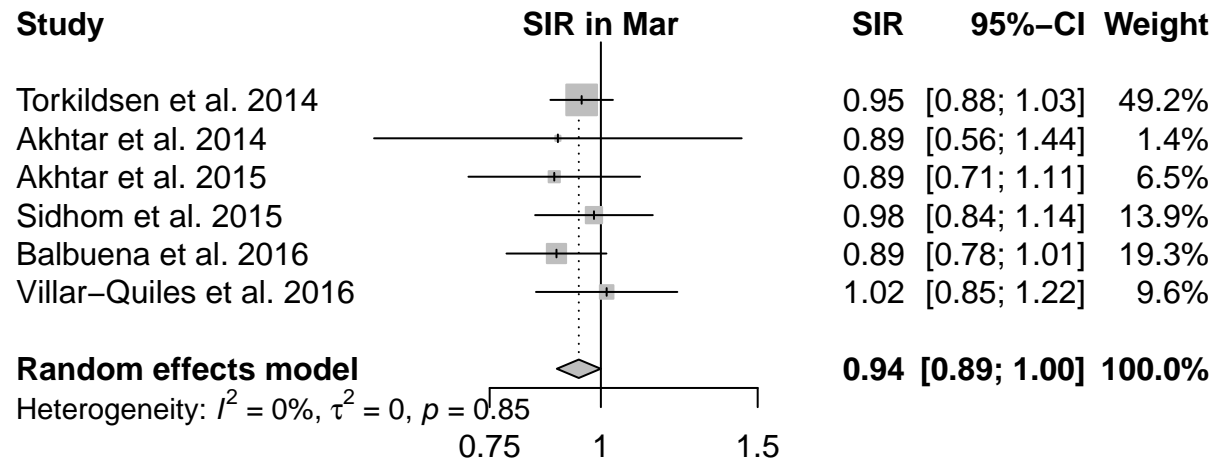

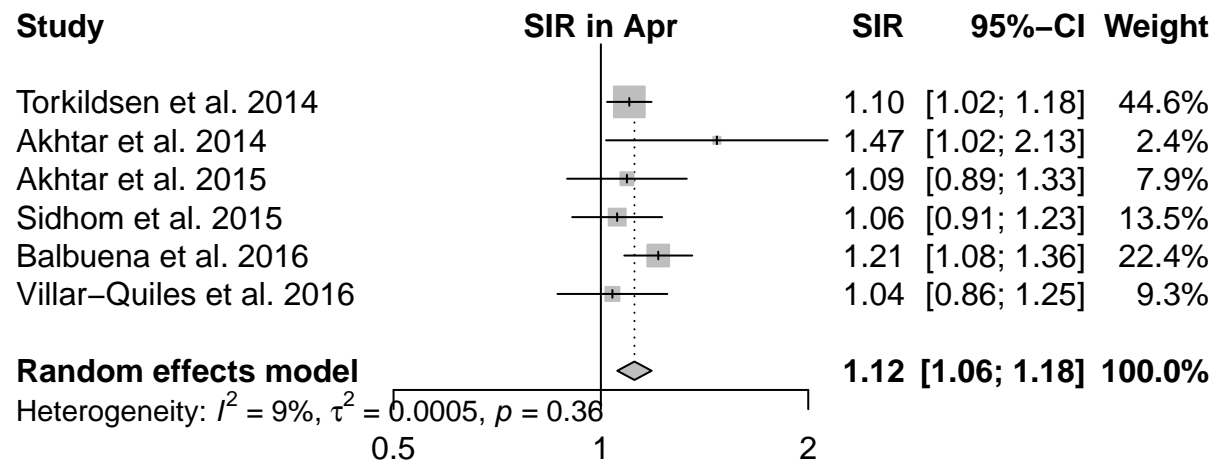

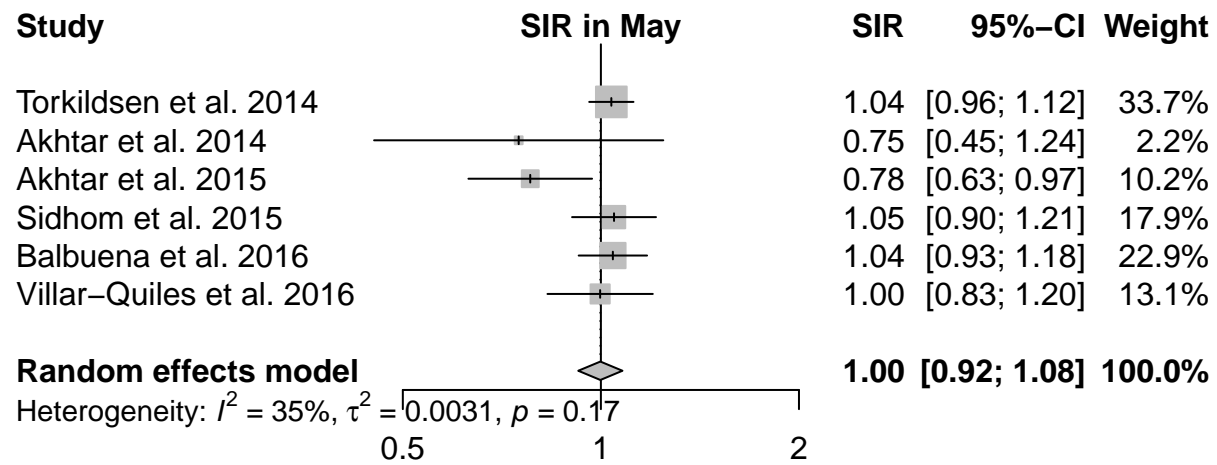

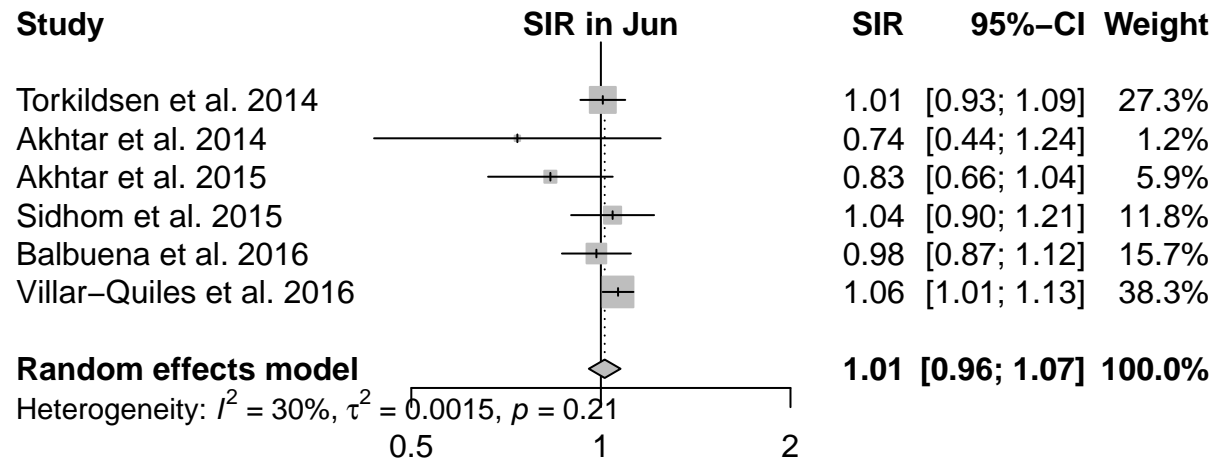

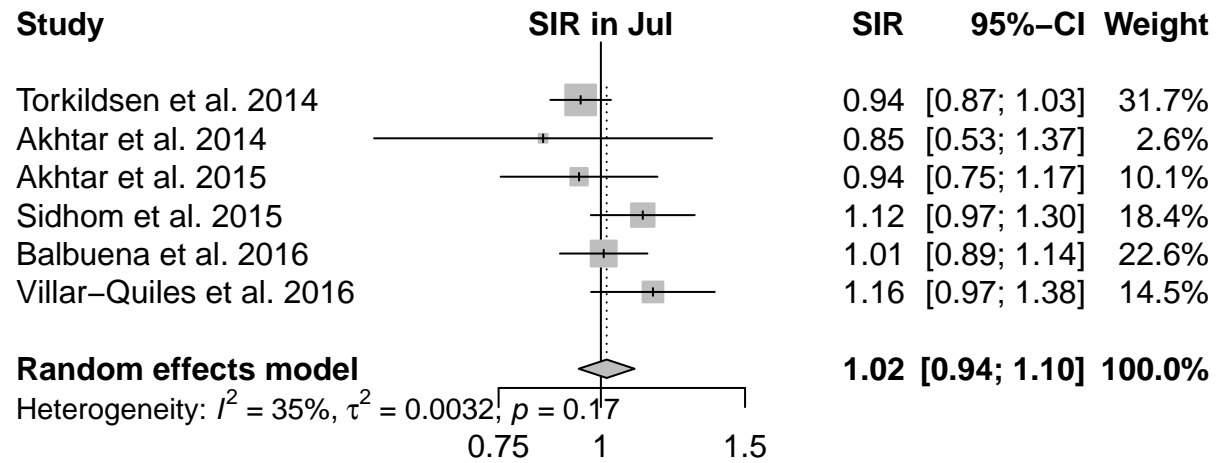

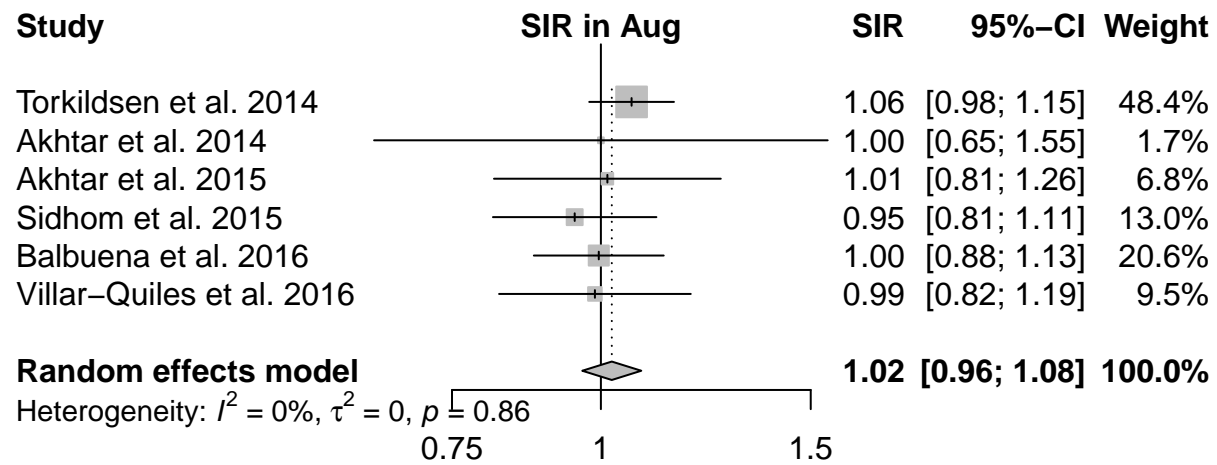



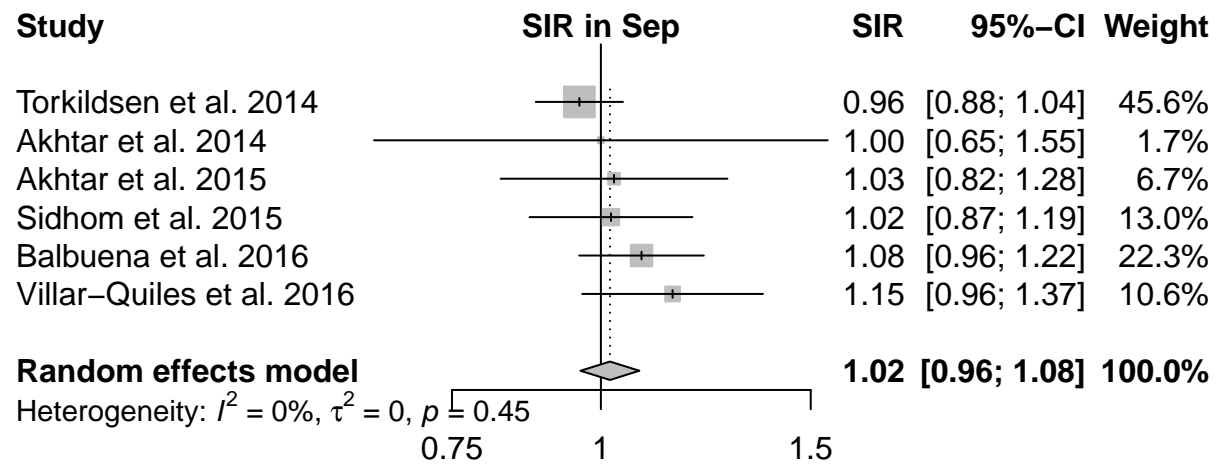

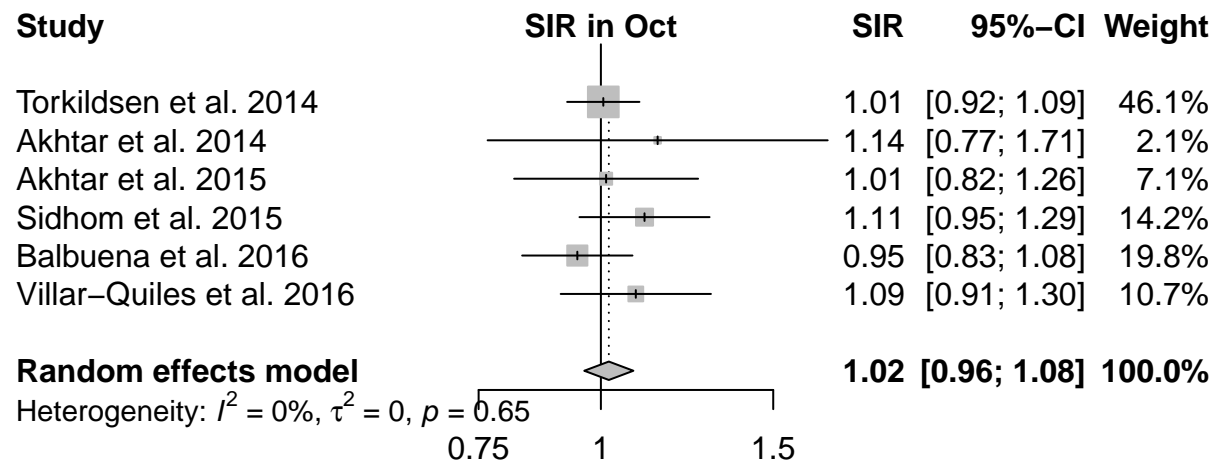

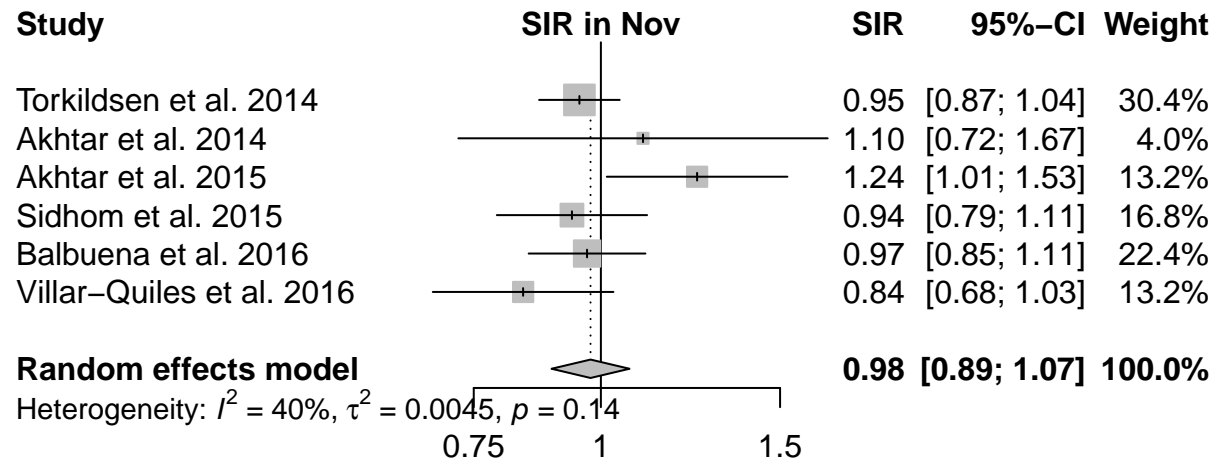

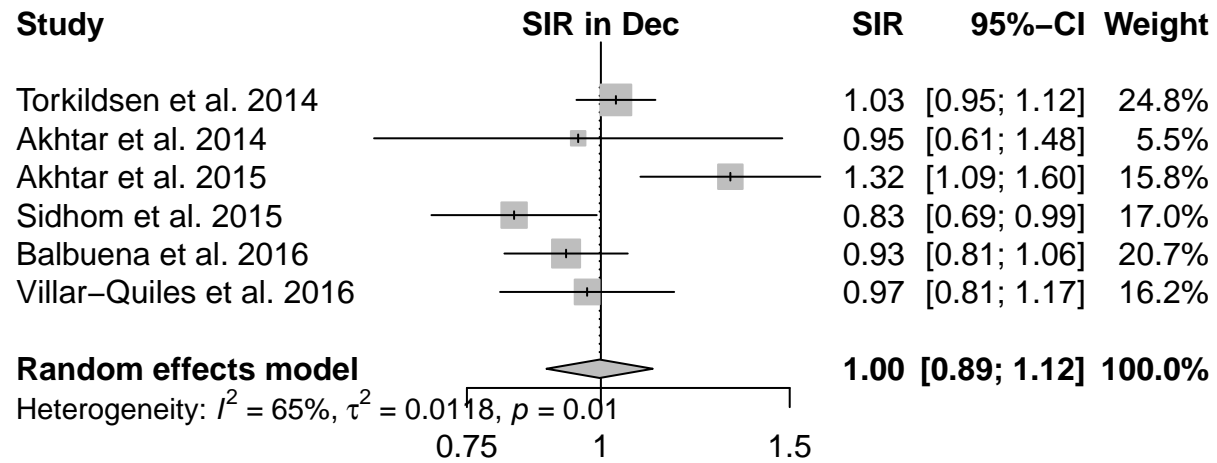

Supplement: pone.0221645.s004.pdf [file pone.0221645.s004.pdf]
