# Supplementary material for: Vitamin D in early life and later risk of multiple sclerosis—A systematic review, meta-analysis
Source: PubMed Central journal article supplement (PMC6711523; doi:10.1371/journal.pone.0221645), 2019-08-27

**Torkildsen et al. 2014**

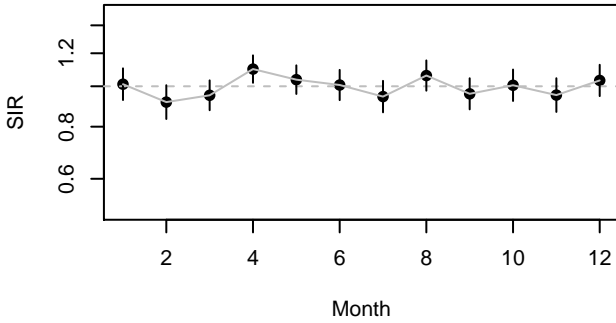

**Akhtar et al. 2014**

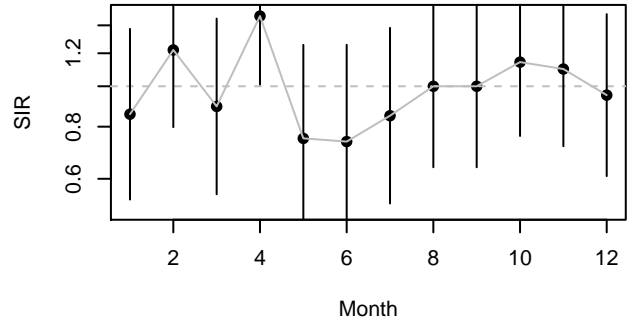

**Akhtar et al. 2015**

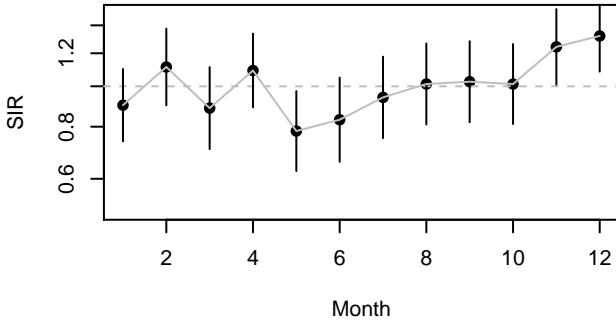

**Sidhom et al. 2015**

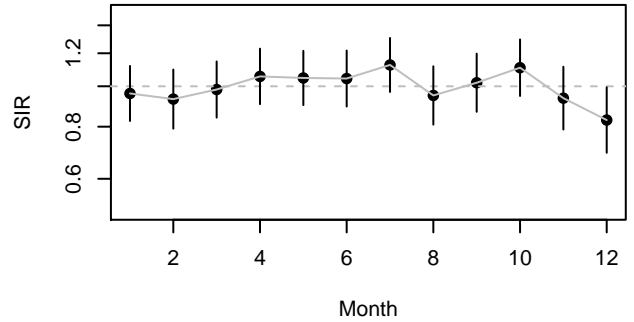

**Balbuena et al. 2016**

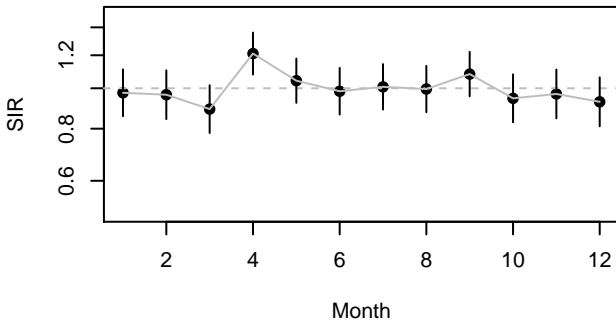

**Villar-Quiles et al. 2016**

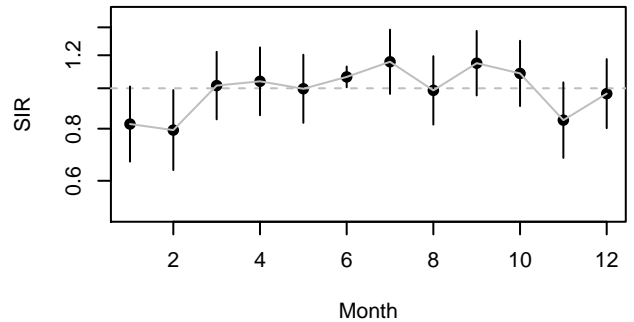

Supplement: pone.0221645.s007.pdf [file pone.0221645.s007.pdf]
