# Supplementary material for: Vitamin D in early life and later risk of multiple sclerosis—A systematic review, meta-analysis
Source: PubMed Central journal article supplement (PMC6711523; doi:10.1371/journal.pone.0221645), 2019-08-27
Supplement: pone.0221645.s008.pdf [file pone.0221645.s008.pdf]

**S1 Table. Search strategy documentation.**

|    | Population                                                                    | Intervention                                                                                                                                      | Comparison | Outcome                  |
|----|-------------------------------------------------------------------------------|---------------------------------------------------------------------------------------------------------------------------------------------------|------------|--------------------------|
|    | PubMed/Medline search strings                                                 |                                                                                                                                                   |            |                          |
|    | AND                                                                           |                                                                                                                                                   |            |                          |
| OR | Antenatal<br>Prenatal<br>Pregnancy<br>Neonatal<br>Offspring<br>Fetus<br>Fetal | <u>Search #1</u><br>Vitamin D<br>Vitamin D2<br>Vitamin D3<br>Ergocalciferol<br>Cholecalciferol<br>Calcitriol<br>1,25(OH)2D<br>25-hydroxyvitamin D |            | Multiple sclerosis<br>MS |
|    |                                                                               | <u>Search #2</u><br>Season<br>Seasonality<br>Month of birth                                                                                       |            |                          |
|    |                                                                               | <u>Search #3</u><br>Immigration<br>Emigration                                                                                                     |            |                          |

\*All searches were sorted by relevance and search in [All Fields] using MeSH Terms
