# Supplementary material for: Vitamin D in early life and later risk of multiple sclerosis—A systematic review, meta-analysis
Source: PubMed Central journal article supplement (PMC6711523; doi:10.1371/journal.pone.0221645), 2019-08-27
Supplement: pone.0221645.s009.pdf [file pone.0221645.s009.pdf]

**S2 Table. Methodological quality of included studies.**

**S2A Table. Study quality of case-control studies based on the Newcastle-Ottawa scale (The following coding instructions were taken from the Newcastle-Ottawa Scale website (attached in S1 File)).**

| First author, y (ref)                | Is the case definition adequate? | Representativeness of the Cases | Selection of Controls | Definition of Controls | Comparability of Cases and Controls on the Basis of the Design or Analysis <sup>2</sup> | Ascertainment of exposure | Same method of ascertainment for cases and controls | Non-Response rate | Total scores <sup>3</sup> |
|--------------------------------------|----------------------------------|---------------------------------|-----------------------|------------------------|-----------------------------------------------------------------------------------------|---------------------------|-----------------------------------------------------|-------------------|---------------------------|
| <b>Population studies</b>            |                                  |                                 |                       |                        |                                                                                         |                           |                                                     |                   |                           |
| Salzer et al. 2012 [23]              | ★                                | ☆                               | ★                     | ★                      | ★☆                                                                                      | ★                         | ★                                                   | ☆                 | 6                         |
| Ueda et al. 2014 [24]                | ★                                | ★                               | ★                     | ★                      | ★★                                                                                      | ★                         | ★                                                   | ☆                 | 8                         |
| Cortese et al. 2015 [27]             | ★                                | ★                               | ★                     | ★                      | ★☆                                                                                      | ☆                         | ★                                                   | ☆                 | 6                         |
| Munger et al. 2016 [25]              | ★                                | ★                               | ★                     | ★                      | ★★                                                                                      | ★                         | ★                                                   | ☆                 | 8                         |
| Nielsen et al. 2017 [26]             | ★                                | ★                               | ★                     | ★                      | ★★                                                                                      | ★                         | ★                                                   | ☆                 | 8                         |
| <b>Season/month of birth studies</b> |                                  |                                 |                       |                        |                                                                                         |                           |                                                     |                   |                           |
| Barros et al. 2013 [32]              | ★                                | ★                               | ★                     | ☆                      | ★★                                                                                      | ★                         | ★                                                   | ☆                 | 7                         |
| Fragoso et al. 2013 [39]             | ★                                | ★                               | ☆                     | ★                      | ★★                                                                                      | ★                         | ★                                                   | ☆                 | 7                         |
| Verheul et al. 2013 [44]             | ★                                | ★                               | ★                     | ☆                      | ☆☆                                                                                      | ★                         | ★                                                   | ☆                 | 5                         |
| Torkildsen et al. 2014 [33]          | ★                                | ★                               | ★                     | ☆                      | ★★                                                                                      | ★                         | ★                                                   | ☆                 | 7                         |
| Sidhom et al. 2015 [36]              | ★                                | ★                               | ★                     | ☆                      | ★☆                                                                                      | ★                         | ★                                                   | ☆                 | 6                         |
| Poorolajal et al. 2015 [41]          | ★                                | ★                               | ☆                     | ★                      | ☆☆                                                                                      | ★                         | ★                                                   | ☆                 | 5                         |
| Rodriguez Cruz et al. 2016 [45]      | ☆                                | ★                               | ★                     | ☆                      | ★★                                                                                      | ★                         | ★                                                   | ☆                 | 6                         |

**Study quality of case-control studies (continued)**

|                                   |   |   |   |   |    |   |   |   |   |
|-----------------------------------|---|---|---|---|----|---|---|---|---|
| Balbuena et al.<br>2016 [43]      | ★ | ★ | ★ | ☆ | ☆☆ | ★ | ★ | ☆ | 5 |
| Villar-Quiles et al.<br>2016 [44] | ★ | ☆ | ★ | ☆ | ☆☆ | ★ | ★ | ☆ | 6 |

\*Each fulfilled (★) star represents if individual criterion within the section was fulfilled

**S2B Table. Study quality of cohort studies**

| First author, y (ref)                | Representativeness of the exposed cohort | Selection of the non exposed cohort | Ascertainment of exposure | Demonstration that outcome of interest was not present at start of study | Comparability of cohorts on the basis of the design or analysis <sup>2</sup> | Assessment of outcome | Was follow-up long enough for outcomes to occur | Adequacy of follow up of cohorts | Total scores <sup>1</sup> |
|--------------------------------------|------------------------------------------|-------------------------------------|---------------------------|--------------------------------------------------------------------------|------------------------------------------------------------------------------|-----------------------|-------------------------------------------------|----------------------------------|---------------------------|
| <b>Population studies</b>            |                                          |                                     |                           |                                                                          |                                                                              |                       |                                                 |                                  |                           |
| Mirzaei et al. 2011 [28]             | ★                                        | ★                                   | ☆                         | ★                                                                        | ★★                                                                           | ★                     | ★                                               | ★                                | 8                         |
| <b>Season/month of birth studies</b> |                                          |                                     |                           |                                                                          |                                                                              |                       |                                                 |                                  |                           |
| Gardener et al. 2009 [38]            | ★                                        | NA                                  | ★                         | ★                                                                        | ★★                                                                           | ★                     | ★                                               | ☆                                | 7                         |
| Strey et al. 2013 [42]               | ★                                        | NA                                  | ★                         | ★                                                                        | ★☆                                                                           | ★                     | ★                                               | ☆                                | 6                         |
| Akhtar et al. 2014 [34]              | ★                                        | ★                                   | ★                         | NA                                                                       | ★☆                                                                           | ★                     | NA                                              | NA                               | 5                         |
| Akhtar et al. 2015 [35]              | ★                                        | ★                                   | ★                         | NA                                                                       | ★☆                                                                           | ★                     | NA                                              | NA                               | 5                         |
| <b>Migration studies</b>             |                                          |                                     |                           |                                                                          |                                                                              |                       |                                                 |                                  |                           |
| Hammond et al. 2000 [53]             |                                          |                                     |                           |                                                                          |                                                                              |                       |                                                 |                                  |                           |
| Cabre et al. 2005 [55]               | ★                                        | ★                                   | ★                         | NA                                                                       | ★★                                                                           | ★                     | NA                                              | ☆                                | 6                         |
| McLeod et al. 2011 [54]              |                                          |                                     |                           |                                                                          |                                                                              |                       |                                                 |                                  |                           |

\*Each fulfilled (★) star represents if individual criterion within the section was fulfilled; NA; not applicable.

<sup>1</sup> Thresholds for cohort / case control studies: very good studies: 7 to 8 points; good studies: 5 to 6 points; satisfactory: 4 points; unsatisfactory studies: 0 to 3 points

(Adapted for cross-sectional studies)

| First author, y (ref)                              | Representativeness of the sample | Sample size | Non-respondents | Ascertainment of exposure | Comparability of groups on the basis of the design or analysis <sup>2</sup> | Assessment of outcome | Statistical test | Total scores <sup>3</sup> |
|----------------------------------------------------|----------------------------------|-------------|-----------------|---------------------------|-----------------------------------------------------------------------------|-----------------------|------------------|---------------------------|
| <b>Season/month of birth and migration studies</b> |                                  |             |                 |                           |                                                                             |                       |                  |                           |
| Becker et al. 2013 [31]                            | ★                                | ★           | NA              | ★                         | ☆☆                                                                          | ★                     | ★                | 7                         |
| Tolou-Ghamari et al. 2015 [40]                     | ☆                                | ☆           | NA              | ★                         | ☆☆                                                                          | ★                     | ★                | 3                         |
| Berg-Hansen et al. 2015 [56]                       | ★                                | ★           | NA              | ★                         | ☆☆                                                                          | ★                     | ★                | 6                         |

\*Each fulfilled (★) star represents if individual criterion within the section was fulfilled; NA; not applicable.

<sup>2</sup> For population studies one star (☆☆) was given if a study controls for age/sex while two stars (★★) if any additional relevant factors were controlled (e.g. ethnicity, latitude and season of birth); For season/month of birth studies one star (☆☆) was given if a study controls for place/year of birth while two stars (★★) if both factors were controlled; For migration studies one star (☆☆) was given if a study controls for age/sex while two stars (★★) if any other relevant factors were controlled

<sup>3</sup> Thresholds for cross-sectional studies: very good studies: 5 points; good studies: 4 points; satisfactory studies: 3 points; unsatisfactory studies: 0 to 2 points

**S2C Table. Methodological quality of systematic reviews or meta-analysis using the AMSTAR score**

| First author, y (ref)       | A priori design | Duplicate study selection/extraction | Comprehensive literature search | Status of publication as exclusion criterion | Included and excluded studies provided | Characteristics of included studies provided | Quality assessed | Quality used appropriately | Synthesis methods appropriate | Publication bias assessed | Conflict of interest stated | Rating   |
|-----------------------------|-----------------|--------------------------------------|---------------------------------|----------------------------------------------|----------------------------------------|----------------------------------------------|------------------|----------------------------|-------------------------------|---------------------------|-----------------------------|----------|
| Torkildsen et al. 2012 [18] | NR              | NR                                   | +                               | +                                            | NR                                     | +                                            | -                | -                          | -                             | -                         | +                           | Moderate |
| Dobson et al. 2013 [30]     | +               | NR                                   | +                               | -                                            | +                                      | +                                            | -                | -                          | +                             | +                         | +                           | Moderate |
| Gale et al. 1995 [52]       | -               | -                                    | +                               | -                                            | -                                      | +                                            | +                | +                          | NA                            | -                         | -                           | Moderate |

NA: not applicable; NR: not reported/can't answer; + = yes; - = no
