# Supplementary material for: Vitamin D in early life and later risk of multiple sclerosis—A systematic review, meta-analysis
Source: PubMed Central journal article supplement (PMC6711523; doi:10.1371/journal.pone.0221645), 2019-08-27
Supplement: pone.0221645.s010.pdf [file pone.0221645.s010.pdf]

**S3 Table. Confounders (Population studies).**

| First author, y (ref)    | Confounders Considered                                           | Additional Confounders                                                                                                                                                                                                                                                                                                                      | Matched                                                                                                  | Stratified by                  | Did considering for additional confounders changed the results?                                                                                                          | Adjusted for relevant MS risk factors (latitude at birth <sup>1</sup> ; ethnicity <sup>2</sup> ; smoking <sup>3</sup> ; MS heredity <sup>4</sup> ; sun exposure <sup>5</sup> ; Epstein-Barr virus <sup>6</sup> ) |
|--------------------------|------------------------------------------------------------------|---------------------------------------------------------------------------------------------------------------------------------------------------------------------------------------------------------------------------------------------------------------------------------------------------------------------------------------------|----------------------------------------------------------------------------------------------------------|--------------------------------|--------------------------------------------------------------------------------------------------------------------------------------------------------------------------|------------------------------------------------------------------------------------------------------------------------------------------------------------------------------------------------------------------|
| Mirzaei et al. 2011 [28] | Latitude at birth<br>Ancestry<br>Pack-years of cigarette smoking | Smoking during pregnancy<br>Maternal and Paternal<br>Education level<br>Paternal occupation<br>Mothers prepregnancy BMI<br>Daughters' preschool intake of cod liver oil or Multivitamins<br>Mothers' recreational physical activity                                                                                                         |                                                                                                          | Age in months<br>Calendar year | No                                                                                                                                                                       | 1,2,3                                                                                                                                                                                                            |
| Salzer et al. 2012 [23]  |                                                                  |                                                                                                                                                                                                                                                                                                                                             | Sex<br>Biobank Sampling date<br>Age                                                                      |                                |                                                                                                                                                                          |                                                                                                                                                                                                                  |
| Ueda et al. 2014 [24]    |                                                                  | <b>In early life:</b><br>Month of birth<br>Latitude of birth<br>Breastfeeding<br><b>In adult life:</b><br>25-hydroxyvitamin D exposure<br>Sun exposure<br>Vitamin D intake from dairy products<br>Fatty fish consumption<br>Smoking<br>Body mass index at 20 years of age<br><b>Plus:</b><br>Ancestry<br>MS heredity<br>Socioeconomic group | Sex<br>Age<br>Residential area                                                                           |                                | No                                                                                                                                                                       | 1,2,3,4,5                                                                                                                                                                                                        |
| Cortese et al. 2015 [27] | Age<br>Sex                                                       | Smoking before disease onset<br>History of infectious mononucleosis<br>Sun exposure<br>Body shape at age 15<br>Education<br>Consumption of fatty fish                                                                                                                                                                                       |                                                                                                          |                                | No                                                                                                                                                                       | 3,5,6                                                                                                                                                                                                            |
| Munger et al. 2016 [25]  |                                                                  | Sex of the child<br>Gestational age at sample collection<br>Season of sample collection                                                                                                                                                                                                                                                     | Region of Birth<br>Date of maternal sample collection<br>Date of mother's birth<br>Date of child's birth |                                | A 20.03 ng/mL increase in maternal 25(OH)D level was associated with a non-statistically significant 48% reduced risk of MS in the offspring (RR 0.52, 95% CI 0.22-1.19) | 1                                                                                                                                                                                                                |
| Nielsen et al. 2017 [26] | Sex<br>Age<br>Date of Birth                                      | Parental ethnicity<br>Birthweight<br>Gestational age                                                                                                                                                                                                                                                                                        |                                                                                                          |                                | No                                                                                                                                                                       | 2                                                                                                                                                                                                                |
