# Supplementary material for: Vitamin D in early life and later risk of multiple sclerosis—A systematic review, meta-analysis
Source: PubMed Central journal article supplement (PMC6711523; doi:10.1371/journal.pone.0221645), 2019-08-27
Supplement: pone.0221645.s011.pdf [file pone.0221645.s011.pdf]

**S4 Table. Confounders (The season or the month of birth studies).**

| First author, y (ref)            | Confounders Considered                                                                                                                                                           | Matched                                                          | Most relevant confounders (place of birth <sup>1</sup> ; year of birth <sup>2</sup> ) |
|----------------------------------|----------------------------------------------------------------------------------------------------------------------------------------------------------------------------------|------------------------------------------------------------------|---------------------------------------------------------------------------------------|
| Northern hemisphere              |                                                                                                                                                                                  |                                                                  |                                                                                       |
| Gardener et al. 2009 [38]        | Age in months<br>Calendar year<br>Latitude at birth<br>Paternal occupation<br>Sibship size<br>Pack-years of smoking in adulthood<br>Quantile of energy-adjusted vitamin D intake | n.a                                                              | 1,2                                                                                   |
| Streym et al. 2013 [42]          | Year of birth                                                                                                                                                                    | n.a                                                              | 2                                                                                     |
| Barros et al. 2013 [32]          | n.a                                                                                                                                                                              | Same birth time<br>Geographical area                             | 1,2                                                                                   |
| Torkildsen et al. 2014 [33]      | Year of birth<br>Place of birth                                                                                                                                                  | n.a                                                              | 1,2                                                                                   |
| Akhtar et al. 2014 [34]          | Gender<br>Nationality                                                                                                                                                            | Time interval                                                    | 2                                                                                     |
| Akhtar et al. 2015 [35]          | n.a                                                                                                                                                                              | Time interval                                                    | 2                                                                                     |
| Tolou-Ghamari et al. 2015 [40]   | n.a                                                                                                                                                                              | n.a                                                              | n.a                                                                                   |
| Poorolajal et al. 2015 [41]      | n.a                                                                                                                                                                              | Same time interval<br>Same hospital                              | n.a                                                                                   |
| Sidhom et al. 2015 [36]          | n.a                                                                                                                                                                              | Year of birth                                                    | 2                                                                                     |
| Rodriguez Cruz et al. 2016 [45]  | n.a                                                                                                                                                                              | Time and Region                                                  | 1,2                                                                                   |
| Balbuena et al. 2016 [43]        | n.a                                                                                                                                                                              | n.a                                                              | n.a                                                                                   |
| Villar-Quiles et al. 2016 [37]   | Year of birth<br>Gender                                                                                                                                                          | n.a                                                              | 2                                                                                     |
| Southern hemisphere              |                                                                                                                                                                                  |                                                                  |                                                                                       |
| Becker et al. 2013 [31]          | Ethnicity<br>Latitude                                                                                                                                                            | n.a                                                              | 1                                                                                     |
| Fragoso et al. 2013 [39]         | n.a                                                                                                                                                                              | Same latitude<br>Similar age<br>Ethnicity<br>Socioeconomic level | 1,2                                                                                   |
| Southern and northern hemisphere |                                                                                                                                                                                  |                                                                  |                                                                                       |
| Verheul et al. 2013 [44]         | n.a                                                                                                                                                                              | n.a                                                              | n.a                                                                                   |
